# Supplementary material for: Multicomponent intranasal adjuvant for mucosal and durable systemic SARS-CoV-2 immunity in young and aged mice
Source: PubMed Central journal article supplement (PMC10310740; doi:10.1038/s41541-023-00691-1), 2023-06-29
Supplement: 41541_2023_691_MOESM1_ESM.pdf [file 41541_2023_691_MOESM1_ESM.pdf]

SUPPLEMENTAL INFORMATION:

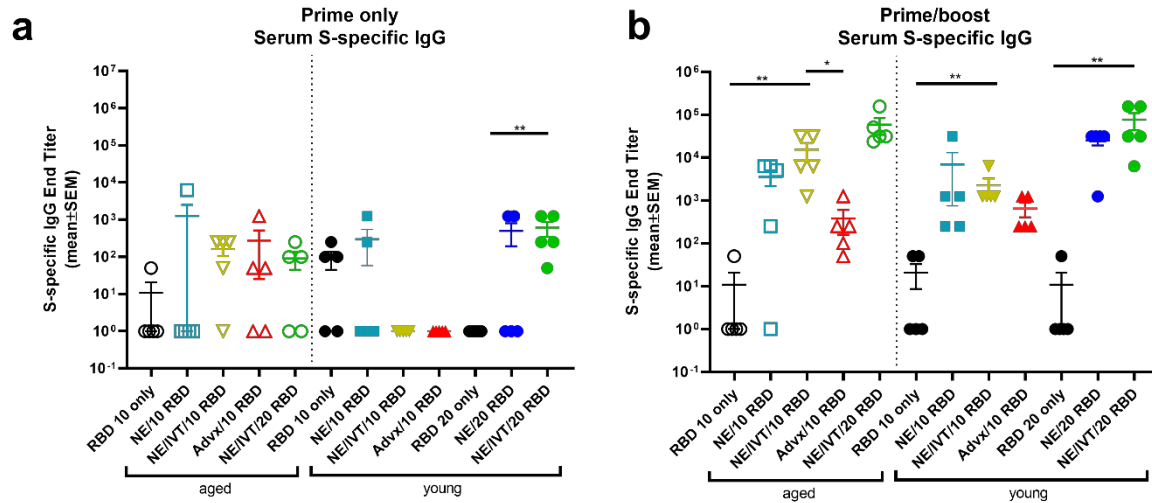

**Supplementary Figure 1. Comparison of full-length S protein-specific IgG titers in immunized mice from Figure 1B-D.** Young (8wk) and aged (8mo) mice were immunized IN with 10 or 20  $\mu$ g RBD with PBS, NE, or NE/IVT, or IM with RBD with Addavax. S-specific IgG titers were measured in sera by ELISA two weeks after (A) prime and (B) prime/boost immunizations. Titters are shown as mean $\pm$ SEM (n=5/grp) (\* $p$ <0.05, \*\* $p$ <0.01 by Mann-Whitney U test shown only for NE/IVT/10 RBD compared to other treatments in the same age group at the same RBD dose, and for NE/IVT/20 RBD compared only to high dose RBD groups within the young group.)

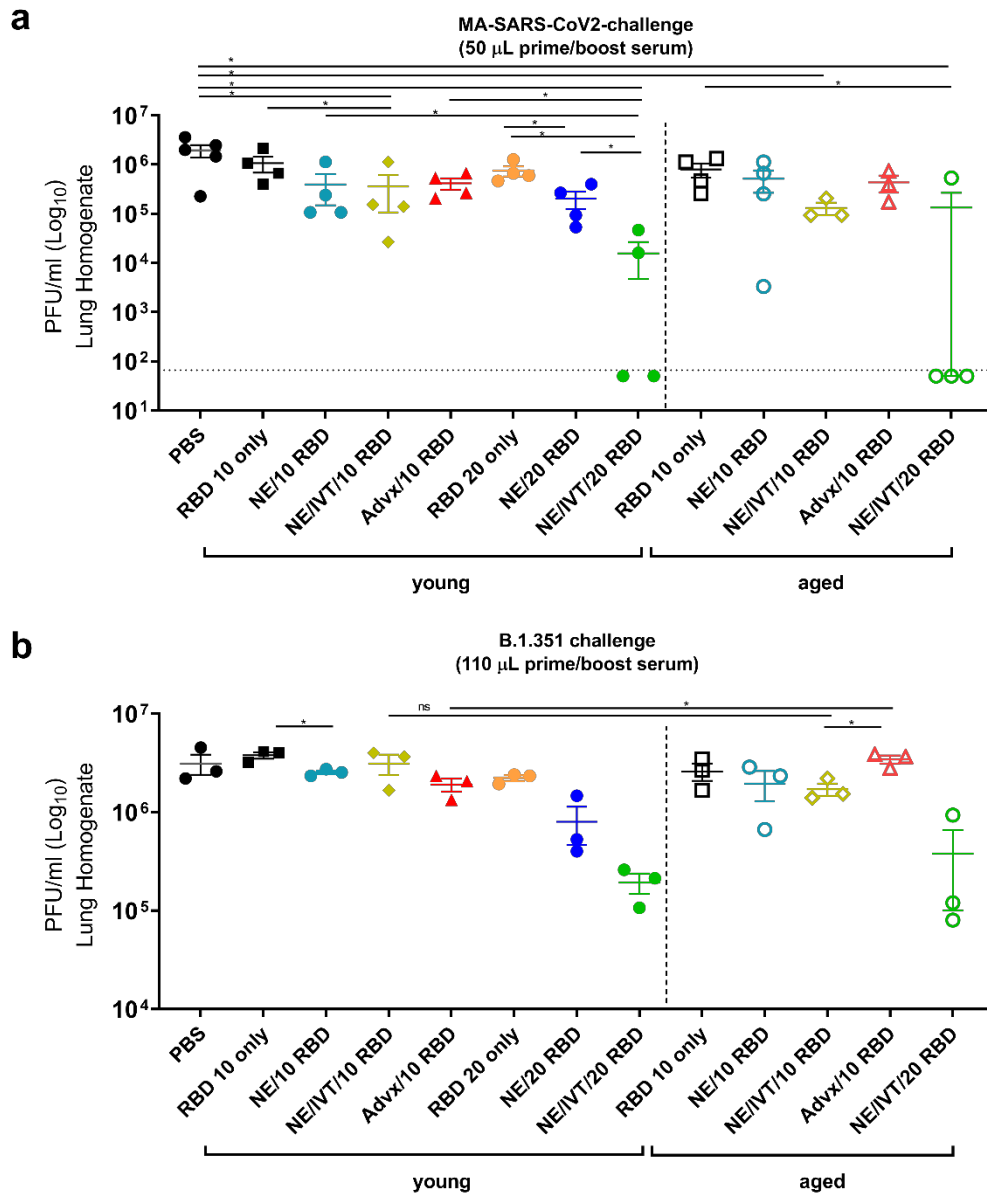

**Supplementary Figure 2. Passive transfer of prime/boost serum from young and aged immunized mice into naïve mice and challenge with MA-SARS-CoV-2. (A)** Sera from young or aged mice given two IN immunizations with 10 or 20 µg RBD with PBS, NE, or NE/IVT, or IM immunizations with 10 µg RBD and Addavax were pooled at wk 6, and 50 µL of the pooled serum was transferred IP into each naïve mouse 2h prior to challenge IN with  $10^4$  pfu MA-SARS-CoV-2. Viral load was assessed in lung homogenate by plaque assay at 3dpi. The plaque detection limit is indicated by the horizontal dashed line. Lung viral titers are shown as mean±SEM (n=5/grp) (\* $p < 0.05$ , \*\* $p < 0.01$  by Mann-Whitney U test). **(B)** Sera from young or aged mice given two IN immunizations with 10 or 20 µg RBD with PBS, NE, or NE/IVT, or IM immunizations with 10 µg RBD and Addavax were pooled wk 10, and 110 µL of the pooled serum was transferred IP into each naïve mouse 2h prior to challenge IN with  $5 \times 10^3$  pfu B.1.351. Viral load was assessed in lung homogenate by plaque assay at 3dpi. The plaque detection limit is indicated by the horizontal dashed line. Lung viral titers are shown as mean±SEM (n=5/grp) (\* $p < 0.05$ , \*\* $p < 0.01$  by unpaired t-test shown only for select groups of interest).

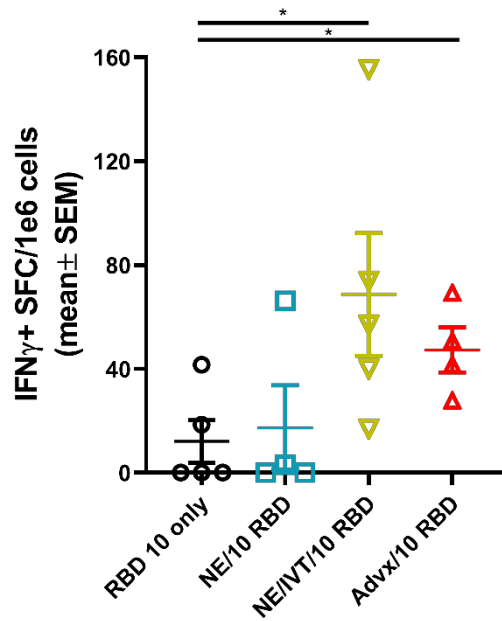

**Supplementary Figure 3. ELISpot analysis of IFN $\gamma$  production in antigen-specific CD8<sup>+</sup> T cells in splenocytes from aged immunized mice.** Splenocytes were isolated from aged mice given three IN immunizations with 10 $\mu$ g RBD with PBS, NE, or NE/IVT, or IM immunizations with 10  $\mu$ g RBD and Addavax two weeks after the final immunization (wk 10) and stimulated *ex vivo* with 4  $\mu$ g/mL of the H-2K<sup>b</sup> class I restricted peptide, VVLSFELL for 48h and analyzed by an IFN- $\gamma$  ELISpot assay. The number of IFN- $\gamma$  producing CD8 T cells are shown as spot-forming cells per 1x10<sup>6</sup> splenocytes as mean $\pm$ SEM (n=5/grp) (\* $p$ <0.05, \*\* $p$ <0.01 by Mann-Whitney U test shown only for NE/IVT/10 RBD compared to other treatments in the same age group at the same RBD dose, and for. (\* $p$ <0.05, \*\* $p$ <0.01 by Mann-Whitney U test).

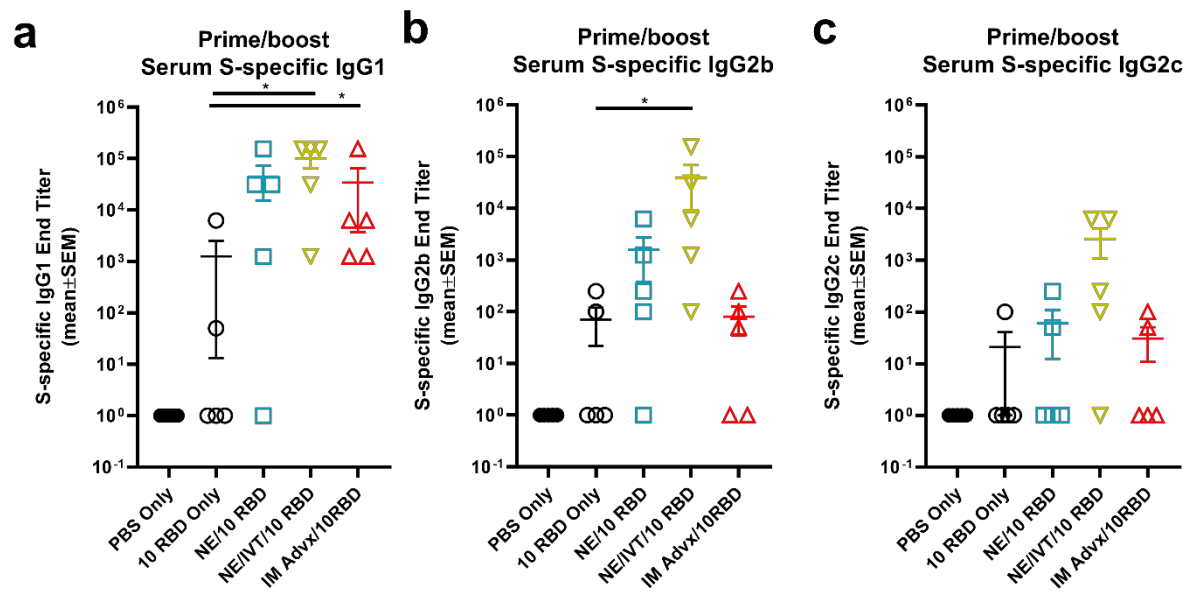

**Supplementary Figure 4. Serum IgG subclass profile analysis after prime/boost immunization of senescent mice.** Serum S-specific IgG subclass titers were measured two weeks after prime/boost immunization of 14-17 mo old mice described in Figure 6. (D) IgG1, (E) IgG2b, (F) IgG2c, were measured after the last immunization. Titers are shown as mean±SEM (n=5/grp) (\* $p < 0.05$ , \*\* $p < 0.01$  by Mann-Whitney U test).

# Supplementary Table 1. Complete statistical analysis of figures 1, 2, 4 and 5

TABLE S1. Complete statistical analysis of figures 1, 2, 4 and 5.

Figure 1 Total IgG, IgG subclasses, and BAL IgA (\*p<0.05, \*\*p<0.01, \*\*\*p<0.001, ns (nonsignificant) by Mann Whitney U test)

| A. | IgG wk2           | RBD10 old | NE/10 RBD old | NE/IVT 10 RBD old | advx/10RBD old                                                                                    | NE/IVT 20 RBD old                                                                     | RBD10 y                                                                  | NE/10 RBD y                                                   | NE/IVT/10 RBD y                                   | advx/10RBD y                          | RBD20 y                   | NE/20 RBD y   | NE/IVT/20RBD y |
|----|-------------------|-----------|---------------|-------------------|---------------------------------------------------------------------------------------------------|---------------------------------------------------------------------------------------|--------------------------------------------------------------------------|---------------------------------------------------------------|---------------------------------------------------|---------------------------------------|---------------------------|---------------|----------------|
|    | RBD10 old         |           | ns            | ns                | ns                                                                                                | ns                                                                                    | ns                                                                       | ns                                                            | ns                                                | ns                                    | ns                        | ns            | *              |
|    | NE/10 RBD old     |           |               | ns                | ns                                                                                                | ns                                                                                    | ns                                                                       | ns                                                            | ns                                                | ns                                    | ns                        | ns            | ns             |
|    | NE/IVT 10 RBD old |           |               |                   | ns                                                                                                | ns                                                                                    | ns                                                                       | ns                                                            | ns                                                | ns                                    | ns                        | ns            | *              |
|    | advx/10RBD old    |           |               |                   |                                                                                                   | ns                                                                                    | ns                                                                       | ns                                                            | ns                                                | ns                                    | ns                        | ns            | *              |
|    | NE/IVT 20 RBD old |           |               |                   |                                                                                                   |                                                                                       | ns                                                                       | ns                                                            | ns                                                | ns                                    | ns                        | ns            | ns             |
|    | RBD10 y           |           |               |                   |                                                                                                   |                                                                                       |                                                                          | ns                                                            | ns                                                | ns                                    | ns                        | ns            | ns             |
|    | NE/10 RBD y       |           |               |                   |                                                                                                   |                                                                                       |                                                                          |                                                               | ns                                                | ns                                    | ns                        | ns            | ns             |
|    | NE/IVT/10 RBD y   |           |               |                   |                                                                                                   |                                                                                       |                                                                          |                                                               |                                                   | ns                                    | ns                        | ns            | ns             |
|    | advx/10RBD y      |           |               |                   |                                                                                                   |                                                                                       |                                                                          |                                                               |                                                   |                                       | ns                        | ns            | *              |
|    | RBD20 y           |           |               |                   |                                                                                                   |                                                                                       |                                                                          |                                                               |                                                   |                                       |                           | ns            | *              |
|    | NE/20 RBD y       |           |               |                   |                                                                                                   |                                                                                       |                                                                          |                                                               |                                                   |                                       |                           |               | *              |
|    | NE/IVT/20RBD y    |           |               |                   |                                                                                                   |                                                                                       |                                                                          |                                                               |                                                   |                                       |                           |               |                |
|    |                   |           |               |                   |                                                                                                   |                                                                                       |                                                                          |                                                               |                                                   |                                       |                           |               |                |
| B. | IgG wk6           | RBD10 old | NE/10 RBD old | NE/IVT 10 RBD old | advx/10RBD old                                                                                    | NE/IVT 20 RBD old                                                                     | RBD10 y                                                                  | NE/10 RBD y                                                   | NE/IVT/10 RBD y                                   | advx/10RBD y                          | RBD20 y                   | NE/20 RBD y   | NE/IVT/20RBD y |
|    | RBD10 old         |           | ns            | **                | ns                                                                                                | **                                                                                    | ns                                                                       | *                                                             | ***                                               | *                                     | ns                        | **            | **             |
|    | NE/10 RBD old     |           |               | ns                | ns                                                                                                | *                                                                                     | ns                                                                       | ns                                                            | ns                                                | ns                                    | ns                        | *             | *              |
|    | NE/IVT 10 RBD old |           |               |                   | *                                                                                                 | ns                                                                                    | **                                                                       | ns                                                            | ns                                                | *                                     | **                        | **            | ns             |
|    | advx/10RBD old    |           |               |                   |                                                                                                   | *                                                                                     | ns                                                                       | ns                                                            | *                                                 | ns                                    | ns                        | *             | *              |
|    | NE/IVT 20 RBD old |           |               |                   |                                                                                                   |                                                                                       | **                                                                       | **                                                            | *                                                 | *                                     | **                        | **            | ns             |
|    | RBD10 y           |           |               |                   |                                                                                                   |                                                                                       |                                                                          | *                                                             | ***                                               | *                                     | ns                        | **            | **             |
|    | NE/10 RBD y       |           |               |                   |                                                                                                   |                                                                                       |                                                                          |                                                               | ns                                                | ns                                    | *                         | *             | *              |
|    | NE/IVT/10 RBD y   |           |               |                   |                                                                                                   |                                                                                       |                                                                          |                                                               |                                                   | **                                    | ***                       | ns            | ns             |
|    | advx/10RBD y      |           |               |                   |                                                                                                   |                                                                                       |                                                                          |                                                               |                                                   |                                       | *                         | *             | *              |
|    | RBD20 y           |           |               |                   |                                                                                                   |                                                                                       |                                                                          |                                                               |                                                   |                                       |                           | **            | **             |
|    | NE/20 RBD y       |           |               |                   |                                                                                                   |                                                                                       |                                                                          |                                                               |                                                   |                                       |                           |               | ns             |
|    | NE/IVT/20RBD y    |           |               |                   |                                                                                                   |                                                                                       |                                                                          |                                                               |                                                   |                                       |                           |               |                |
|    |                   |           |               |                   |                                                                                                   |                                                                                       |                                                                          |                                                               |                                                   |                                       |                           |               |                |
| C. | IgG wk10          | RBD10 old | NE/10 RBD old | NE/IVT 10 RBD old | advx/10RBD old                                                                                    | NE/IVT 20 RBD old                                                                     | RBD10 y                                                                  | NE/10 RBD y                                                   | NE/IVT/10 RBD y                                   | advx/10RBD y                          | RBD20 y                   | NE/20 RBD y   | NE/IVT/20RBD y |
|    | RBD10 old         |           | **            | **                | *                                                                                                 | **                                                                                    | ns                                                                       | ***                                                           | ***                                               | **                                    | ns                        | **            | **             |
|    | NE/10 RBD old     |           |               | ns                | ns                                                                                                | **                                                                                    | **                                                                       | ns                                                            | *                                                 | ns                                    | **                        | **            | ns             |
|    | NE/IVT 10 RBD old |           |               |                   | *                                                                                                 | ns                                                                                    | **                                                                       | ns                                                            | ns                                                | ns                                    | **                        | ns            | ns             |
|    | advx/10RBD old    |           |               |                   |                                                                                                   | **                                                                                    | **                                                                       | *                                                             | **                                                | *                                     | **                        | **            | *              |
|    | NE/IVT 20 RBD old |           |               |                   |                                                                                                   |                                                                                       | **                                                                       | ns                                                            | ns                                                | ns                                    | **                        | ns            | ns             |
|    | RBD10 y           |           |               |                   |                                                                                                   |                                                                                       |                                                                          | ***                                                           | ***                                               | **                                    | ns                        | **            | **             |
|    | NE/10 RBD y       |           |               |                   |                                                                                                   |                                                                                       |                                                                          |                                                               | ns                                                | ns                                    | ***                       | ns            | ns             |
|    | NE/IVT/10 RBD y   |           |               |                   |                                                                                                   |                                                                                       |                                                                          |                                                               |                                                   | ns                                    | ***                       | ns            | ns             |
|    | advx/10RBD y      |           |               |                   |                                                                                                   |                                                                                       |                                                                          |                                                               |                                                   |                                       | **                        | ns            | ns             |
|    | RBD20 y           |           |               |                   |                                                                                                   |                                                                                       |                                                                          |                                                               |                                                   |                                       |                           | **            | **             |
|    | NE/20 RBD y       |           |               |                   |                                                                                                   |                                                                                       |                                                                          |                                                               |                                                   |                                       |                           |               | ns             |
|    | NE/IVT/20RBD y    |           |               |                   |                                                                                                   |                                                                                       |                                                                          |                                                               |                                                   |                                       |                           |               |                |
|    |                   |           |               |                   |                                                                                                   |                                                                                       |                                                                          |                                                               |                                                   |                                       |                           |               |                |
| D. | IgG wk10          | A         | B             | C                 | D                                                                                                 | E                                                                                     | F                                                                        | G                                                             | H                                                 | I                                     | L                         | K             | J              |
| A  | RBD10 old         |           | **            | **                | **                                                                                                | **                                                                                    | ns                                                                       | **                                                            | **                                                | **                                    | **                        | **            | **             |
| B  | NE/10 RBD old     |           |               | ns                | ns                                                                                                | * <th>**</th> <th>ns</th> <th>ns</th> <th>ns</th> <th>**</th> <th>* <th>ns</th> </th> | **                                                                       | ns                                                            | ns                                                | ns                                    | **                        | * <th>ns</th> | ns             |
| C  | NE/IVT 10 RBD old |           |               |                   | * <th>ns</th> <th>**</th> <th>ns</th> <th>ns</th> <th>ns</th> <th>**</th> <th>**</th> <th>ns</th> | ns                                                                                    | **                                                                       | ns                                                            | ns                                                | ns                                    | **                        | **            | ns             |
| D  | advx/10RBD old    |           |               |                   |                                                                                                   | **                                                                                    | * <th>ns</th> <th>* <th>* <th>**</th> <th>**</th> <th>* </th></th></th>  | ns                                                            | * <th>* <th>**</th> <th>**</th> <th>* </th></th>  | * <th>**</th> <th>**</th> <th>* </th> | **                        | **            | *              |
| E  | NE/IVT 20 RBD old |           |               |                   |                                                                                                   |                                                                                       | **                                                                       | * <th>ns</th> <th>ns</th> <th>**</th> <th>ns</th> <th>ns</th> | ns                                                | ns                                    | **                        | ns            | ns             |
| F  | RBD10 y           |           |               |                   |                                                                                                   |                                                                                       |                                                                          | **                                                            | **                                                | **                                    | ns                        | **            | **             |
| G  | NE/10 RBD y       |           |               |                   |                                                                                                   |                                                                                       |                                                                          |                                                               | ns                                                | ns                                    | **                        | * <th>ns</th> | ns             |
| H  | NE/IVT/10 RBD y   |           |               |                   |                                                                                                   |                                                                                       |                                                                          |                                                               |                                                   | ns                                    | **                        | ns            | ns             |
| I  | advx/10RBD y      |           |               |                   |                                                                                                   |                                                                                       |                                                                          |                                                               |                                                   |                                       | **                        | ns            | ns             |
| L  | RBD20 y           |           |               |                   |                                                                                                   |                                                                                       |                                                                          |                                                               |                                                   |                                       |                           | **            | **             |
| K  | NE/20 RBD y       |           |               |                   |                                                                                                   |                                                                                       |                                                                          |                                                               |                                                   |                                       |                           |               | ns             |
| J  | NE/IVT/20RBD y    |           |               |                   |                                                                                                   |                                                                                       |                                                                          |                                                               |                                                   |                                       |                           |               |                |
|    |                   |           |               |                   |                                                                                                   |                                                                                       |                                                                          |                                                               |                                                   |                                       |                           |               |                |
| E. | IgG2b wk10        | A         | B             | C                 | D                                                                                                 | E                                                                                     | F                                                                        | G                                                             | H                                                 | I                                     | L                         | K             | J              |
| A  | RBD10 old         |           | **            | **                | ns                                                                                                | **                                                                                    | ns                                                                       | **                                                            | **                                                | **                                    | ns                        | **            | **             |
| B  | NE/10 RBD old     |           |               | ns                | ns                                                                                                | ns                                                                                    | **                                                                       | ns                                                            | ns                                                | ns                                    | **                        | ns            | ns             |
| C  | NE/IVT 10 RBD old |           |               |                   | ns                                                                                                | ns                                                                                    | **                                                                       | ns                                                            | ns                                                | * <th>**</th> <th>ns</th> <th>ns</th> | **                        | ns            | ns             |
| D  | advx/10RBD old    |           |               |                   |                                                                                                   | * <th>ns</th> <th>ns</th> <th>ns</th> <th>ns</th> <th>* <th>* <th>ns</th> </th></th>  | ns                                                                       | ns                                                            | ns                                                | ns                                    | * <th>* <th>ns</th> </th> | * <th>ns</th> | ns             |
| E  | NE/IVT 20 RBD old |           |               |                   |                                                                                                   |                                                                                       | **                                                                       | * <th>ns</th> <th>* <th>**</th> <th>ns</th> <th>ns</th> </th> | ns                                                | * <th>**</th> <th>ns</th> <th>ns</th> | **                        | ns            | ns             |
| F  | RBD10 y           |           |               |                   |                                                                                                   |                                                                                       |                                                                          | **                                                            | **                                                | **                                    | * <th>**</th> <th>**</th> | **            | **             |
| G  | NE/10 RBD y       |           |               |                   |                                                                                                   |                                                                                       |                                                                          |                                                               | ns                                                | ns                                    | **                        | ns            | ns             |
| H  | NE/IVT/10 RBD y   |           |               |                   |                                                                                                   |                                                                                       |                                                                          |                                                               |                                                   | ns                                    | **                        | ns            | ns             |
| I  | advx/10RBD y      |           |               |                   |                                                                                                   |                                                                                       |                                                                          |                                                               |                                                   |                                       | **                        | * <th>**</th> | **             |
| L  | RBD20 y           |           |               |                   |                                                                                                   |                                                                                       |                                                                          |                                                               |                                                   |                                       |                           | **            | **             |
| K  | NE/20 RBD y       |           |               |                   |                                                                                                   |                                                                                       |                                                                          |                                                               |                                                   |                                       |                           |               | ns             |
| J  | NE/IVT/20RBD y    |           |               |                   |                                                                                                   |                                                                                       |                                                                          |                                                               |                                                   |                                       |                           |               |                |
|    |                   |           |               |                   |                                                                                                   |                                                                                       |                                                                          |                                                               |                                                   |                                       |                           |               |                |
| F. | IgG2c wk10        | A         | B             | C                 | D                                                                                                 | E                                                                                     | F                                                                        | G                                                             | H                                                 | I                                     | L                         | K             | J              |
| A  | RBD10 old         |           | ns            | ns                | ns                                                                                                | * <th>ns</th> <th>ns</th> <th>ns</th> <th>ns</th> <th>ns</th> <th>ns</th> <th>ns</th> | ns                                                                       | ns                                                            | ns                                                | ns                                    | ns                        | ns            | ns             |
| B  | NE/10 RBD old     |           |               | ns                | ns                                                                                                | ns                                                                                    | ns                                                                       | ns                                                            | ns                                                | ns                                    | ns                        | ns            | ns             |
| C  | NE/IVT 10 RBD old |           |               |                   | ns                                                                                                | ns                                                                                    | ns                                                                       | ns                                                            | ns                                                | ns                                    | ns                        | ns            | ns             |
| D  | advx/10RBD old    |           |               |                   |                                                                                                   | ns                                                                                    | ns                                                                       | ns                                                            | ns                                                | ns                                    | ns                        | ns            | ns             |
| E  | NE/IVT 20 RBD old |           |               |                   |                                                                                                   |                                                                                       | * <th>* <th>ns</th> <th>ns</th> <th>* <th>ns</th> <th>ns</th> </th></th> | * <th>ns</th> <th>ns</th> <th>* <th>ns</th> <th>ns</th> </th> | ns                                                | ns                                    | * <th>ns</th> <th>ns</th> | ns            | ns             |
| F  | RBD10 y           |           |               |                   |                                                                                                   |                                                                                       |                                                                          | * <th>* <th>**</th> <th>* <th>**</th> <th>**</th> </th></th>  | * <th>**</th> <th>* <th>**</th> <th>**</th> </th> | **                                    | * <th>**</th> <th>**</th> | **            | **             |
| G  | NE/10 RBD y       |           |               |                   |                                                                                                   |                                                                                       |                                                                          | ns                                                            | ns                                                | ns                                    | ns                        | * <th>ns</th> | ns             |
| H  | NE/IVT/10 RBD y   |           |               |                   |                                                                                                   |                                                                                       |                                                                          |                                                               | ns                                                | ns                                    | ns                        | ns            | ns             |
| I  | advx/10RBD y      |           |               |                   |                                                                                                   |                                                                                       |                                                                          |                                                               |                                                   | ns                                    | ns                        | ns            | ns             |
| L  | RBD20 y           |           |               |                   |                                                                                                   |                                                                                       |                                                                          |                                                               |                                                   |                                       | ns                        | ns            | ns             |
| K  | NE/20 RBD y       |           |               |                   |                                                                                                   |                                                                                       |                                                                          |                                                               |                                                   |                                       |                           | ns            | ns             |
| J  | NE/IVT/20RBD y    |           |               |                   |                                                                                                   |                                                                                       |                                                                          |                                                               |                                                   |                                       |                           |               |                |
|    |                   |           |               |                   |                                                                                                   |                                                                                       |                                                                          |                                                               |                                                   |                                       |                           |               |                |
| G. | IgA wk10          | RBD10 old | NE/10 RBD old | NE/IVT 10 RBD old | advx/10RBD old                                                                                    | NE/IVT 20 RBD old                                                                     | RBD10 y                                                                  | NE/10 RBD y                                                   | NE/IVT/10 RBD y                                   | advx/10RBD y                          | RBD20 y                   | NE/20 RBD y   | NE/IVT/20RBD y |
|    | RBD10 old         |           | ns            | ns                | ns                                                                                                | ns                                                                                    | ns                                                                       | ns                                                            | ns                                                | ns                                    | ns                        | ns            | ns             |
|    | NE/10 RBD old     |           |               | *                 | ns                                                                                                | **                                                                                    | ns                                                                       | *                                                             | **                                                | ns                                    | ns                        | **            | **             |
|    | NE/IVT 10 RBD old |           |               |                   | *                                                                                                 | ns                                                                                    | ns                                                                       | ns                                                            | ns                                                | ns                                    | ns                        | ns            | ns             |
|    | advx/10RBD old    |           |               |                   |                                                                                                   | *                                                                                     | ns                                                                       | *                                                             | ns                                                | ns                                    | *                         | *             | *              |
|    | NE/IVT 20 RBD old |           |               |                   |                                                                                                   |                                                                                       | ns                                                                       | ns                                                            | ns                                                | ns                                    | ns                        | ns            | ns             |
|    | RBD10 y           |           |               |                   |                                                                                                   |                                                                                       |                                                                          | ns                                                            | ns                                                | ns                                    | ns                        | ns            | ns             |
|    | NE/10 RBD y       |           |               |                   |                                                                                                   |                                                                                       |                                                                          |                                                               | *                                                 | ns                                    | ns                        | ns            | ns             |
|    | NE/IVT/10 RBD y   |           |               |                   |                                                                                                   |                                                                                       |                                                                          |                                                               |                                                   | *                                     | **                        | ns            | ns             |
|    | advx/10RBD y      |           |               |                   |                                                                                                   |                                                                                       |                                                                          |                                                               |                                                   |                                       | ns                        | ns            | ns             |
|    | RBD20 y           |           |               |                   |                                                                                                   |                                                                                       |                                                                          |                                                               |                                                   |                                       |                           | **            | ns             |
|    | NE/20 RBD y       |           |               |                   |                                                                                                   |                                                                                       |                                                                          |                                                               |                                                   |                                       |                           |               | ns             |
|    | NE/IVT/20RBD y    |           |               |                   |                                                                                                   |                                                                                       |                                                                          |                                                               |                                                   |                                       |                           |               |                |

Figure 2 Neutralizing antibody titers (\*p<0.05, \*\*p<0.01, \*\*\*p<0.001, ns (nonsignificant) by Mann Whitney U test)

| A. WT MNT wk10    | RBD10 old | NE/10 RBD old | NE/IVT 10 RBD old | advx/10RBD old | NE/IVT 20 RBD old | RBD10 y | NE/10 RBD y | NE/IVT/10 RBD y | advx/10RBD y | RBD20 y | NE/20 RBD y | NE/IVT/20RBD y |
|-------------------|-----------|---------------|-------------------|----------------|-------------------|---------|-------------|-----------------|--------------|---------|-------------|----------------|
| RBD10 old         |           | **            | **                | ns             | **                | ns      | **          | **              | **           | ns      | **          | **             |
| NE/10 RBD old     |           |               | ns                | ns             | **                | **      | ns          | *               | ns           | **      | *           | *              |
| NE/IVT 10 RBD old |           |               |                   | *              | **                | **      | ns          | ns              | ns           | **      | ns          | ns             |
| advx/10RBD old    |           |               |                   |                | **                | ns      | **          | *               | ns           | ns      | *           | *              |
| NE/IVT 20 RBD old |           |               |                   |                |                   | **      | **          | ns              | **           | **      | *           | ns             |
| RBD10 y           |           |               |                   |                |                   |         | **          | **              | **           | ns      | **          | **             |
| NE/10 RBD y       |           |               |                   |                |                   |         |             | *               | ns           | **      | *           | *              |
| NE/IVT/10 RBD y   |           |               |                   |                |                   |         |             |                 | *            | **      | ns          | ns             |
| advx/10RBD y      |           |               |                   |                |                   |         |             |                 |              | **      | ns          | *              |
| RBD20 y           |           |               |                   |                |                   |         |             |                 |              |         | **          | **             |
| NE/20 RBD y       |           |               |                   |                |                   |         |             |                 |              |         |             | ns             |
| NE/IVT/20RBD y    |           |               |                   |                |                   |         |             |                 |              |         |             |                |
| B. delta MNT wk10 | RBD10 old | NE/10 RBD old | NE/IVT 10 RBD old | advx/10RBD old | NE/IVT 20 RBD old | RBD10 y | NE/10 RBD y | NE/IVT/10 RBD y | advx/10RBD y | RBD20 y | NE/20 RBD y | NE/IVT/20RBD y |
| RBD10 old         |           | *             | **                | ns             | **                | ns      | **          | **              | **           | ns      | **          | **             |
| NE/10 RBD old     |           |               | ns                | ns             | ns                | *       | ns          | *               | ns           | *       | ns          | ns             |
| NE/IVT 10 RBD old |           |               |                   | **             | *                 | **      | ns          | *               | ns           | **      | ns          | ns             |
| advx/10RBD old    |           |               |                   |                | *                 | ns      | *           | **              | ns           | ns      | **          | *              |
| NE/IVT 20 RBD old |           |               |                   |                |                   | **      | *           | *               | *            | **      | ns          | ns             |
| RBD10 y           |           |               |                   |                |                   |         | **          | **              | **           | ns      | **          | **             |
| NE/10 RBD y       |           |               |                   |                |                   |         |             | ns              | *            | **      | ns          | ns             |
| NE/IVT/10 RBD y   |           |               |                   |                |                   |         |             |                 | **           | **      | ns          | ns             |
| advx/10RBD y      |           |               |                   |                |                   |         |             |                 |              | **      | *           | *              |
| RBD20 y           |           |               |                   |                |                   |         |             |                 |              |         | **          | **             |
| NE/20 RBD y       |           |               |                   |                |                   |         |             |                 |              |         |             | ns             |
| NE/IVT/20RBD y    |           |               |                   |                |                   |         |             |                 |              |         |             |                |
| C. SA MNT wk10    | RBD10 old | NE/10 RBD old | NE/IVT 10 RBD old | advx/10RBD old | NE/IVT 20 RBD old | RBD10 y | NE/10 RBD y | NE/IVT/10 RBD y | advx/10RBD y | RBD20 y | NE/20 RBD y | NE/IVT/20RBD y |
| RBD10 old         |           | ns            | *                 | ns             | **                | ns      | ns          | *               | **           | ns      | **          | **             |
| NE/10 RBD old     |           |               | ns                | ns             | ns                | ns      | ns          | ns              | ns           | ns      | ns          | ns             |
| NE/IVT 10 RBD old |           |               |                   | ns             | ns                | *       | ns          | ns              | ns           | ns      | ns          | ns             |
| advx/10RBD old    |           |               |                   |                | **                | ns      | ns          | ns              | ns           | ns      | *           | **             |
| NE/IVT 20 RBD old |           |               |                   |                |                   | **      | ns          | *               | *            | **      | *           | ns             |
| RBD10 y           |           |               |                   |                |                   |         | ns          | *               | **           | ns      | **          | **             |
| NE/10 RBD y       |           |               |                   |                |                   |         |             | ns              | *            | ns      | ns          | ns             |
| NE/IVT/10 RBD y   |           |               |                   |                |                   |         |             |                 | ns           | *       | ns          | ns             |
| advx/10RBD y      |           |               |                   |                |                   |         |             |                 |              | *       | *           | *              |
| RBD20 y           |           |               |                   |                |                   |         |             |                 |              |         | **          | **             |
| NE/20 RBD y       |           |               |                   |                |                   |         |             |                 |              |         |             | ns             |
| NE/IVT/20RBD y    |           |               |                   |                |                   |         |             |                 |              |         |             |                |
| D. omi MNT wk10   | RBD10 old | NE/10 RBD old | NE/IVT 10 RBD old | advx/10RBD old | NE/IVT 20 RBD old | RBD10 y | NE/10 RBD y | NE/IVT/10 RBD y | advx/10RBD y | RBD20 y | NE/20 RBD y | NE/IVT/20RBD y |
| RBD10 old         |           | ns            | ns                | ns             | **                | ns      | *           | *               | ns           | ns      | **          | **             |
| NE/10 RBD old     |           |               | ns                | ns             | *                 | ns      | ns          | ns              | ns           | ns      | ns          | *              |
| NE/IVT 10 RBD old |           |               |                   | ns             | *                 | ns      | ns          | ns              | ns           | ns      | ns          | ns             |
| advx/10RBD old    |           |               |                   |                | *                 | ns      | ns          | ns              | ns           | ns      | *           | **             |
| NE/IVT 20 RBD old |           |               |                   |                |                   | **      | ns          | *               | *            | **      | *           | ns             |
| RBD10 y           |           |               |                   |                |                   |         | *           | ns              | ns           | ns      | *           | **             |
| NE/10 RBD y       |           |               |                   |                |                   |         |             | ns              | ns           | ns      | ns          | ns             |
| NE/IVT/10 RBD y   |           |               |                   |                |                   |         |             |                 | ns           | *       | ns          | ns             |
| advx/10RBD y      |           |               |                   |                |                   |         |             |                 |              | ns      | ns          | *              |
| RBD20 y           |           |               |                   |                |                   |         |             |                 |              |         | **          | **             |
| NE/20 RBD y       |           |               |                   |                |                   |         |             |                 |              |         |             | ns             |
| NE/IVT/20RBD y    |           |               |                   |                |                   |         |             |                 |              |         |             |                |

Figure 4 Splenocyte T-cell recall (\*p<0.05, \*\*p<0.01, \*\*\*p<0.001, ns (nonsignificant) by Mann Whitney U test)

| SPL               |                   | RBD10 old | NE/10 RBD old | NE/IVT 10 RBD old | advx/10RBD old | NE/IVT 20 RBD old | RBD10 y | NE/10 RBD y | NE/IVT/10 RBD y | advx/10RBD y | RBD20 y | NE/20 RBD y | NE/IVT/20RBD y |
|-------------------|-------------------|-----------|---------------|-------------------|----------------|-------------------|---------|-------------|-----------------|--------------|---------|-------------|----------------|
| A. IFNg           | RBD10 old         |           | ns            | ns                | ns             | ns                | ns      | *           | ns              | *            | *       | *           | *              |
|                   | NE/10 RBD old     |           |               | ns                | ns             | **                | ns      | **          | ns              | **           | **      | **          | **             |
|                   | NE/IVT 10 RBD old |           |               |                   | ns             | ns                | ns      | ns          | ns              | ns           | ns      | ns          | ns             |
|                   | advx/10RBD old    |           |               |                   |                | *                 | ns      | *           | ns              | *            | *       | *           | *              |
|                   | NE/IVT 20 RBD old |           |               |                   |                |                   | *       | ns          | *               | ns           | ns      | ns          | ns             |
|                   | RBD10 y           |           |               |                   |                |                   |         | ns          | ns              | ns           | ns      | ns          | *              |
|                   | NE/10 RBD y       |           |               |                   |                |                   |         |             | ns              | ns           | ns      | ns          | *              |
|                   | NE/IVT/10 RBD y   |           |               |                   |                |                   |         |             |                 | ns           | ns      | ns          | *              |
|                   | advx/10RBD y      |           |               |                   |                |                   |         |             |                 |              | ns      | ns          | *              |
|                   | RBD20 y           |           |               |                   |                |                   |         |             |                 |              |         | ns          | ns             |
|                   | NE/20 RBD y       |           |               |                   |                |                   |         |             |                 |              |         |             | ns             |
|                   | NE/IVT/20RBD y    |           |               |                   |                |                   |         |             |                 |              |         |             | ns             |
|                   | B. IL2            | RBD10 old |               | ns                | ns             | ns                | *       | ns          | *               | ns           | ns      | ns          | ns             |
| NE/10 RBD old     |                   |           |               | ns                | ns             | ns                | ns      | ns          | ns              | ns           | ns      | ns          | ns             |
| NE/IVT 10 RBD old |                   |           |               |                   | *              | ns                | *       | ns          | ns              | ns           | ns      | ns          | ns             |
| advx/10RBD old    |                   |           |               |                   |                | ns                | ns      | *           | ns              | ns           | ns      | ns          | ns             |
| NE/IVT 20 RBD old |                   |           |               |                   |                |                   | ns      | ns          | ns              | ns           | ns      | ns          | ns             |
| RBD10 y           |                   |           |               |                   |                |                   |         | *           | ns              | ns           | ns      | ns          | ns             |
| NE/10 RBD y       |                   |           |               |                   |                |                   |         |             | ns              | ns           | ns      | ns          | ns             |
| NE/IVT/10 RBD y   |                   |           |               |                   |                |                   |         |             |                 | ns           | ns      | ns          | ns             |
| advx/10RBD y      |                   |           |               |                   |                |                   |         |             |                 |              | ns      | ns          | ns             |
| RBD20 y           |                   |           |               |                   |                |                   |         |             |                 |              |         | ns          | ns             |
| NE/20 RBD y       |                   |           |               |                   |                |                   |         |             |                 |              |         |             | ns             |
| NE/IVT/20RBD y    |                   |           |               |                   |                |                   |         |             |                 |              |         |             | ns             |
| C. IP10           |                   | RBD10 old |               | ns                | ns             | *                 | ns      | ns          | *               | ns           | ns      | *           | ns             |
|                   | NE/10 RBD old     |           |               | ns                | ns             | *                 | ns      | *           | ns              | ns           | **      | *           | *              |
|                   | NE/IVT 10 RBD old |           |               |                   | ns             | ns                | ns      | ns          | ns              | ns           | ns      | ns          | *              |
|                   | advx/10RBD old    |           |               |                   |                | *                 | ns      | *           | *               | *            | *       | *           | *              |
|                   | NE/IVT 20 RBD old |           |               |                   |                |                   | ns      | ns          | ns              | ns           | *       | ns          | ns             |
|                   | RBD10 y           |           |               |                   |                |                   | ns      | ns          | ns              | ns           | ns      | ns          | ns             |
|                   | NE/10 RBD y       |           |               |                   |                |                   |         | ns          | ns              | ns           | *       | ns          | ns             |
|                   | NE/IVT/10 RBD y   |           |               |                   |                |                   |         |             |                 | ns           | *       | *           | *              |
|                   | advx/10RBD y      |           |               |                   |                |                   |         |             |                 |              | *       | ns          | *              |
|                   | RBD20 y           |           |               |                   |                |                   |         |             |                 |              |         | ns          | ns             |
|                   | NE/20 RBD y       |           |               |                   |                |                   |         |             |                 |              |         |             | ns             |
|                   | NE/IVT/20RBD y    |           |               |                   |                |                   |         |             |                 |              |         |             | ns             |
|                   | D. TNFa           | RBD10 old |               | ns                | ns             | ns                | ns      | ns          | ns              | ns           | ns      | ns          | ns             |
| NE/10 RBD old     |                   |           |               | ns                | ns             | **                | ns      | *           | ns              | *            | *       | **          | **             |
| NE/IVT 10 RBD old |                   |           |               |                   | ns             | ns                | ns      | ns          | ns              | ns           | ns      | ns          | ns             |
| advx/10RBD old    |                   |           |               |                   |                | *                 | ns      | *           | ns              | *            | *       | *           | *              |
| NE/IVT 20 RBD old |                   |           |               |                   |                |                   | ns      | ns          | ns              | ns           | ns      | ns          | *              |
| RBD10 y           |                   |           |               |                   |                |                   | ns      | ns          | ns              | ns           | ns      | ns          | *              |
| NE/10 RBD y       |                   |           |               |                   |                |                   |         | ns          | ns              | ns           | ns      | ns          | **             |
| NE/IVT/10 RBD y   |                   |           |               |                   |                |                   |         |             | ns              | *            | ns      | ns          | **             |
| advx/10RBD y      |                   |           |               |                   |                |                   |         |             |                 |              | ns      | ns          | **             |
| RBD20 y           |                   |           |               |                   |                |                   |         |             |                 |              |         | ns          | ns             |
| NE/20 RBD y       |                   |           |               |                   |                |                   |         |             |                 |              |         |             | ns             |
| NE/IVT/20RBD y    |                   |           |               |                   |                |                   |         |             |                 |              |         |             | ns             |
| E. IL4            |                   | RBD10 old |               | ns                | ns             | ns                | ns      | ns          | ns              | ns           | ns      | **          | ns             |
|                   | NE/10 RBD old     |           |               | ns                | ns             | ns                | ns      | ns          | ns              | ns           | ns      | ns          | ns             |
|                   | NE/IVT 10 RBD old |           |               |                   | ns             | ns                | ns      | ns          | ns              | ns           | ns      | ns          | ns             |
|                   | advx/10RBD old    |           |               |                   |                | ns                | ns      | *           | ns              | *            | **      | ns          | ns             |
|                   | NE/IVT 20 RBD old |           |               |                   |                |                   | ns      | ns          | ns              | ns           | ns      | ns          | ns             |
|                   | RBD10 y           |           |               |                   |                |                   | ns      | ns          | ns              | ns           | ns      | ns          | ns             |
|                   | NE/10 RBD y       |           |               |                   |                |                   |         | ns          | ns              | ns           | ns      | ns          | ns             |
|                   | NE/IVT/10 RBD y   |           |               |                   |                |                   |         |             | ns              | ns           | ns      | ns          | ns             |
|                   | advx/10RBD y      |           |               |                   |                |                   |         |             |                 |              | ns      | ns          | ns             |
|                   | RBD20 y           |           |               |                   |                |                   |         |             |                 |              |         | ns          | ns             |
|                   | NE/20 RBD y       |           |               |                   |                |                   |         |             |                 |              |         |             | ns             |
|                   | NE/IVT/20RBD y    |           |               |                   |                |                   |         |             |                 |              |         |             | ns             |
|                   | F. IL5            | RBD10 old |               | *                 | ns             | *                 | *       | ns          | ns              | ns           | *       | *           | ns             |
| NE/10 RBD old     |                   |           |               | ns                | *              | ns                | *       | ns          | ns              | *            | ns      | ns          | ns             |
| NE/IVT 10 RBD old |                   |           |               |                   | ns             | ns                | ns      | ns          | ns              | *            | ns      | ns          | ns             |
| advx/10RBD old    |                   |           |               |                   |                | ns                | ns      | *           | ns              | *            | ns      | *           | *              |
| NE/IVT 20 RBD old |                   |           |               |                   |                |                   | *       | **          | *               | *            | ns      | *           | *              |
| RBD10 y           |                   |           |               |                   |                |                   |         | ns          | ns              | *            | ns      | ns          | *              |
| NE/10 RBD y       |                   |           |               |                   |                |                   |         |             | ns              | **           | ns      | ns          | ns             |
| NE/IVT/10 RBD y   |                   |           |               |                   |                |                   |         |             |                 | **           | ns      | ns          | ns             |
| advx/10RBD y      |                   |           |               |                   |                |                   |         |             |                 |              | ns      | **          | **             |
| RBD20 y           |                   |           |               |                   |                |                   |         |             |                 |              |         | ns          | ns             |
| NE/20 RBD y       |                   |           |               |                   |                |                   |         |             |                 |              |         |             | ns             |
| NE/IVT/20RBD y    |                   |           |               |                   |                |                   |         |             |                 |              |         |             | ns             |
| G. IL13           |                   | RBD10 old |               | ns                | ns             | *                 | *       | ns          | ns              | ns           | *       | ns          | ns             |
|                   | NE/10 RBD old     |           |               | ns                | ns             | *                 | ns      | ns          | ns              | **           | ns      | ns          | ns             |
|                   | NE/IVT 10 RBD old |           |               |                   | ns             | ns                | ns      | ns          | ns              | ns           | ns      | ns          | ns             |
|                   | advx/10RBD old    |           |               |                   |                | ns                | ns      | *           | ns              | ns           | ns      | *           | ns             |
|                   | NE/IVT 20 RBD old |           |               |                   |                |                   | ns      | *           | *               | ns           | ns      | *           | ns             |
|                   | RBD10 y           |           |               |                   |                |                   | ns      | ns          | ns              | ns           | ns      | ns          | ns             |
|                   | NE/10 RBD y       |           |               |                   |                |                   |         | ns          | ns              | ns           | ns      | ns          | ns             |
|                   | NE/IVT/10 RBD y   |           |               |                   |                |                   |         |             |                 | ns           | ns      | ns          | ns             |
|                   | advx/10RBD y      |           |               |                   |                |                   |         |             |                 |              | ns      | ns          | ns             |
|                   | RBD20 y           |           |               |                   |                |                   |         |             |                 |              |         | ns          | ns             |
|                   | NE/20 RBD y       |           |               |                   |                |                   |         |             |                 |              |         |             | ns             |
|                   | NE/IVT/20RBD y    |           |               |                   |                |                   |         |             |                 |              |         |             | ns             |

| SPL |                   |           |               |                   |                |                   |         |             |                 |              |         |             |                |
|-----|-------------------|-----------|---------------|-------------------|----------------|-------------------|---------|-------------|-----------------|--------------|---------|-------------|----------------|
| H.  | IL6               | RBD10 old | NE/10 RBD old | NE/IVT 10 RBD old | advx/10RBD old | NE/IVT 20 RBD old | RBD10 y | NE/10 RBD y | NE/IVT/10 RBD y | advx/10RBD y | RBD20 y | NE/20 RBD y | NE/IVT/20RBD y |
|     | RBD10 old         | ns        | *             | *                 | *              | ns                | ns      | ns          | ns              | ns           | ns      | ns          | *              |
|     | NE/10 RBD old     |           | ns            | ns                | ns             | ns                | ns      | ns          | ns              | ns           | ns      | ns          | ns             |
|     | NE/IVT 10 RBD old |           |               | ns                | ns             | *                 | **      | *           | ns              | ns           | ns      | ns          | ns             |
|     | advx/10RBD old    |           |               |                   | ns             | ns                | *       | ns          | *               | ns           | ns      | ns          | ns             |
|     | NE/IVT 20 RBD old |           |               |                   |                | *                 | **      | *           | **              | **           | ns      | ns          | ns             |
|     | RBD10 y           |           |               |                   |                |                   | ns      | ns          | ns              | *            | ns      | ns          | *              |
|     | NE/10 RBD y       |           |               |                   |                |                   |         | ns          | ns              | *            | ns      | ns          | **             |
|     | NE/IVT/10 RBD y   |           |               |                   |                |                   |         |             | ns              | ns           | ns      | ns          | *              |
|     | advx/10RBD y      |           |               |                   |                |                   |         |             |                 | ns           | ns      | ns          | *              |
|     | RBD20 y           |           |               |                   |                |                   |         |             |                 |              | ns      | ns          | *              |
|     | NE/20 RBD y       |           |               |                   |                |                   |         |             |                 |              |         | ns          | ns             |
|     | NE/IVT/20RBD y    |           |               |                   |                |                   |         |             |                 |              |         |             | ns             |
| SPL |                   | A         | B             | C                 | D              | E                 | F       | G           | H               | I            | L       | K           | J              |
| I.  | IL17A             | RBD10 old | NE/10 RBD old | NE/IVT 10 RBD old | advx/10RBD old | NE/IVT 20 RBD old | RBD10 y | NE/10 RBD y | NE/IVT/10 RBD y | advx/10RBD y | RBD20 y | NE/20 RBD y | NE/IVT/20RBD y |
|     | RBD10 old         | ns        | *             | ns                | *              | ns                | ns      | *           | ns              | *            | *       | *           | *              |
|     | NE/10 RBD old     |           | **            | ns                | **             | ns                | ns      | *           | ns              | ns           | ns      | ns          | **             |
|     | NE/IVT 10 RBD old |           |               | *                 | ns             | *                 | **      | ns          | **              | **           | ns      | ns          | ns             |
|     | advx/10RBD old    |           |               |                   | *              | ns                | ns      | *           | ns              | *            | *       | *           | *              |
|     | NE/IVT 20 RBD old |           |               |                   |                | *                 | **      | *           | **              | **           | *       | *           | ns             |
|     | RBD10 y           |           |               |                   |                |                   | ns      | *           | ns              | *            | *       | *           | *              |
|     | NE/10 RBD y       |           |               |                   |                |                   |         | *           | ns              | ns           | ns      | ns          | **             |
|     | NE/IVT/10 RBD y   |           |               |                   |                |                   |         |             | **              | ns           | ns      | ns          | ns             |
|     | advx/10RBD y      |           |               |                   |                |                   |         |             |                 | **           | **      | **          | **             |
|     | RBD20 y           |           |               |                   |                |                   |         |             |                 |              | ns      | ns          | **             |
|     | NE/20 RBD y       |           |               |                   |                |                   |         |             |                 |              |         | ns          | ns             |
|     | NE/IVT/20RBD y    |           |               |                   |                |                   |         |             |                 |              |         |             | ns             |
| SPL |                   |           |               |                   |                |                   |         |             |                 |              |         |             |                |
| J.  | IL10              | RBD10 old | NE/10 RBD old | NE/IVT 10 RBD old | advx/10RBD old | NE/IVT 20 RBD old | RBD10 y | NE/10 RBD y | NE/IVT/10 RBD y | advx/10RBD y | RBD20 y | NE/20 RBD y | NE/IVT/20RBD y |
|     | RBD10 old         | ns        | ns            | ns                | *              | ns                | ns      | ns          | ns              | ns           | *       | ns          | *              |
|     | NE/10 RBD old     |           | ns            | ns                | ns             | ns                | ns      | ns          | ns              | ns           | ns      | ns          | ns             |
|     | NE/IVT 10 RBD old |           |               | ns                | ns             | ns                | ns      | ns          | ns              | ns           | ns      | ns          | ns             |
|     | advx/10RBD old    |           |               |                   | ns             | ns                | ns      | ns          | ns              | ns           | ns      | ns          | *              |
|     | NE/IVT 20 RBD old |           |               |                   |                | *                 | ns      | ns          | ns              | ns           | ns      | ns          | ns             |
|     | RBD10 y           |           |               |                   |                |                   | ns      | ns          | *               | *            | ns      | ns          | *              |
|     | NE/10 RBD y       |           |               |                   |                |                   |         |             | ns              | ns           | ns      | ns          | **             |
|     | NE/IVT/10 RBD y   |           |               |                   |                |                   |         |             | ns              | ns           | ns      | ns          | *              |
|     | advx/10RBD y      |           |               |                   |                |                   |         |             |                 | ns           | ns      | ns          | ns             |
|     | RBD20 y           |           |               |                   |                |                   |         |             |                 |              | ns      | ns          | ns             |
|     | NE/20 RBD y       |           |               |                   |                |                   |         |             |                 |              |         | ns          | ns             |
|     | NE/IVT/20RBD y    |           |               |                   |                |                   |         |             |                 |              |         |             | ns             |



Figure 5 cLN T-cell recall (\*p<0.05, \*\*p<0.01, \*\*\*p<0.001, ns (nonsignificant) by Mann Whitney U test)

| cLN       |                   |           |               |                   |                |                   |         |             |                 |              |         |             |                |
|-----------|-------------------|-----------|---------------|-------------------|----------------|-------------------|---------|-------------|-----------------|--------------|---------|-------------|----------------|
| <b>A.</b> | IFNg              | RBD10 old | NE/10 RBD old | NE/IVT 10 RBD old | advx/10RBD old | NE/IVT 20 RBD old | RBD10 y | NE/10 RBD y | NE/IVT/10 RBD y | advx/10RBD y | RBD20 y | NE/20 RBD y | NE/IVT/20RBD y |
|           | RBD10 old         | *         |               | ns                | *              | ns                | ns      | *           | ns              | ns           | ns      | ns          | *              |
|           | NE/10 RBD old     |           |               | ns                | *              | *                 | ns      | ns          | ns              | ns           | ns      | ns          | ns             |
|           | NE/IVT 10 RBD old |           |               |                   | *              | ns                | *       | *           | ns              | *            | ns      | ns          | ns             |
|           | advx/10RBD old    |           |               |                   |                | *                 | ns      | ns          | ns              | ns           | ns      | ns          | *              |
|           | NE/IVT 20 RBD old |           |               |                   |                | *                 | **      | ns          | **              | *            | *       | *           | ns             |
|           | RBD10 y           |           |               |                   |                |                   | ns      |             | ns              | ns           | ns      | ns          | *              |
|           | NE/10 RBD y       |           |               |                   |                |                   |         |             | ns              | ns           | ns      | ns          | *              |
|           | NE/IVT/10 RBD y   |           |               |                   |                |                   |         |             | ns              | ns           | ns      | ns          | ns             |
|           | advx/10RBD y      |           |               |                   |                |                   |         |             |                 | ns           | ns      | ns          | *              |
|           | RBD20 y           |           |               |                   |                |                   |         |             |                 |              | ns      | ns          | *              |
|           | NE/20 RBD y       |           |               |                   |                |                   |         |             |                 |              |         | ns          | *              |
|           | NE/IVT/20RBD y    |           |               |                   |                |                   |         |             |                 |              |         |             | *              |
| <b>B.</b> | IL2               | RBD10 old | NE/10 RBD old | NE/IVT 10 RBD old | advx/10RBD old | NE/IVT 20 RBD old | RBD10 y | NE/10 RBD y | NE/IVT/10 RBD y | advx/10RBD y | RBD20 y | NE/20 RBD y | NE/IVT/20RBD y |
|           | RBD10 old         | *         | *             | *                 | *              | *                 | ns      | *           | *               | *            | ns      | *           | *              |
|           | NE/10 RBD old     |           |               | ns                | ns             | ns                | ns      | ns          | ns              | ns           | ns      | ns          | ns             |
|           | NE/IVT 10 RBD old |           |               |                   | ns             | ns                | ns      | ns          | ns              | ns           | *       | ns          | ns             |
|           | advx/10RBD old    |           |               |                   | ns             | ns                | ns      | ns          | ns              | ns           | ns      | ns          | ns             |
|           | NE/IVT 20 RBD old |           |               |                   |                |                   | ns      | ns          | ns              | ns           | ns      | ns          | ns             |
|           | RBD10 y           |           |               |                   |                |                   |         | ns          | ns              | ns           | ns      | ns          | ns             |
|           | NE/10 RBD y       |           |               |                   |                |                   |         |             | ns              | ns           | ns      | ns          | ns             |
|           | NE/IVT/10 RBD y   |           |               |                   |                |                   |         |             | ns              | ns           | *       | ns          | ns             |
|           | advx/10RBD y      |           |               |                   |                |                   |         |             |                 | ns           | ns      | ns          | ns             |
|           | RBD20 y           |           |               |                   |                |                   |         |             |                 |              | ns      | ns          | ns             |
|           | NE/20 RBD y       |           |               |                   |                |                   |         |             |                 |              |         | ns          | ns             |
|           | NE/IVT/20RBD y    |           |               |                   |                |                   |         |             |                 |              |         |             | ns             |
| <b>C.</b> | IP10              | RBD10 old | NE/10 RBD old | NE/IVT 10 RBD old | advx/10RBD old | NE/IVT 20 RBD old | RBD10 y | NE/10 RBD y | NE/IVT/10 RBD y | advx/10RBD y | RBD20 y | NE/20 RBD y | NE/IVT/20RBD y |
|           | RBD10 old         | *         | *             | *                 | ns             | *                 | ns      | ns          | *               | ns           | *       | *           | ns             |
|           | NE/10 RBD old     |           |               | **                | ns             | *                 | ns      | ns          | *               | ns           | ns      | ns          | ns             |
|           | NE/IVT 10 RBD old |           |               |                   | *              | ns                | **      | ns          | ns              | ns           | ns      | ns          | ns             |
|           | advx/10RBD old    |           |               |                   | *              | ns                | ns      | *           | ns              | ns           | ns      | *           | ns             |
|           | NE/IVT 20 RBD old |           |               |                   |                | *                 | **      | ns          | *               | ns           | ns      | ns          | ns             |
|           | RBD10 y           |           |               |                   |                |                   | ns      | *           | ns              | ns           | ns      | *           | ns             |
|           | NE/10 RBD y       |           |               |                   |                |                   |         | *           | ns              | ns           | ns      | *           | ns             |
|           | NE/IVT/10 RBD y   |           |               |                   |                |                   |         |             | ns              | ns           | ns      | ns          | ns             |
|           | advx/10RBD y      |           |               |                   |                |                   |         |             |                 | ns           | ns      | ns          | ns             |
|           | RBD20 y           |           |               |                   |                |                   |         |             |                 |              | ns      | ns          | ns             |
|           | NE/20 RBD y       |           |               |                   |                |                   |         |             |                 |              |         | ns          | ns             |
|           | NE/IVT/20RBD y    |           |               |                   |                |                   |         |             |                 |              |         |             | ns             |
| <b>D.</b> | TNFa              | RBD10 old | NE/10 RBD old | NE/IVT 10 RBD old | advx/10RBD old | NE/IVT 20 RBD old | RBD10 y | NE/10 RBD y | NE/IVT/10 RBD y | advx/10RBD y | RBD20 y | NE/20 RBD y | NE/IVT/20RBD y |
|           | RBD10 old         | *         | *             | *                 | *              | *                 | ns      | ns          | *               | ns           | ns      | ns          | ns             |
|           | NE/10 RBD old     |           |               |                   | ns             | *                 | ns      | ns          | ns              | ns           | ns      | ns          | ns             |
|           | NE/IVT 10 RBD old |           |               |                   | ns             | *                 | **      | ns          | **              | ns           | ns      | ns          | ns             |
|           | advx/10RBD old    |           |               |                   | *              | ns                | ns      | ns          | ns              | ns           | ns      | ns          | ns             |
|           | NE/IVT 20 RBD old |           |               |                   |                | *                 | **      | ns          | **              | ns           | ns      | ns          | ns             |
|           | RBD10 y           |           |               |                   |                |                   | ns      | *           | ns              | ns           | ns      | ns          | ns             |
|           | NE/10 RBD y       |           |               |                   |                |                   |         | *           | ns              | ns           | ns      | ns          | ns             |
|           | NE/IVT/10 RBD y   |           |               |                   |                |                   |         |             | ns              | ns           | ns      | ns          | ns             |
|           | advx/10RBD y      |           |               |                   |                |                   |         |             |                 | ns           | ns      | ns          | ns             |
|           | RBD20 y           |           |               |                   |                |                   |         |             |                 |              | ns      | ns          | ns             |
|           | NE/20 RBD y       |           |               |                   |                |                   |         |             |                 |              |         | ns          | ns             |
|           | NE/IVT/20RBD y    |           |               |                   |                |                   |         |             |                 |              |         |             | ns             |
| <b>E.</b> | IL4               | RBD10 old | NE/10 RBD old | NE/IVT 10 RBD old | advx/10RBD old | NE/IVT 20 RBD old | RBD10 y | NE/10 RBD y | NE/IVT/10 RBD y | advx/10RBD y | RBD20 y | NE/20 RBD y | NE/IVT/20RBD y |
|           | RBD10 old         | ns        |               |                   | ns             | ns                | ns      | ns          | *               | ns           | ns      | ns          | ns             |
|           | NE/10 RBD old     |           |               |                   | ns             | ns                | ns      | ns          | **              | ns           | ns      | ns          | ns             |
|           | NE/IVT 10 RBD old |           |               |                   | ns             | ns                | ns      | ns          | ns              | ns           | ns      | ns          | ns             |
|           | advx/10RBD old    |           |               |                   | ns             | ns                | ns      | ns          | *               | ns           | ns      | ns          | ns             |
|           | NE/IVT 20 RBD old |           |               |                   |                |                   | ns      | ns          | ns              | ns           | ns      | ns          | ns             |
|           | RBD10 y           |           |               |                   |                |                   |         | ns          | *               | ns           | ns      | ns          | ns             |
|           | NE/10 RBD y       |           |               |                   |                |                   |         |             | *               | ns           | ns      | ns          | ns             |
|           | NE/IVT/10 RBD y   |           |               |                   |                |                   |         |             | ns              | ns           | **      | ns          | ns             |
|           | advx/10RBD y      |           |               |                   |                |                   |         |             |                 | ns           | ns      | ns          | ns             |
|           | RBD20 y           |           |               |                   |                |                   |         |             |                 |              | ns      | ns          | ns             |
|           | NE/20 RBD y       |           |               |                   |                |                   |         |             |                 |              |         | ns          | ns             |
|           | NE/IVT/20RBD y    |           |               |                   |                |                   |         |             |                 |              |         |             | ns             |
| <b>F.</b> | IL5               | RBD10 old | NE/10 RBD old | NE/IVT 10 RBD old | advx/10RBD old | NE/IVT 20 RBD old | RBD10 y | NE/10 RBD y | NE/IVT/10 RBD y | advx/10RBD y | RBD20 y | NE/20 RBD y | NE/IVT/20RBD y |
|           | RBD10 old         | *         | *             | *                 | *              | *                 | ns      | *           | *               | *            | *       | *           | *              |
|           | NE/10 RBD old     |           |               | **                | *              | **                | ns      | ns          | **              | **           | ns      | ns          | **             |
|           | NE/IVT 10 RBD old |           |               |                   | ns             | ns                | *       | ns          | ns              | *            | *       | ns          | ns             |
|           | advx/10RBD old    |           |               |                   | ns             | ns                | ns      | ns          | ns              | *            | *       | ns          | ns             |
|           | NE/IVT 20 RBD old |           |               |                   |                |                   | *       | ns          | ns              | *            | **      | ns          | ns             |
|           | RBD10 y           |           |               |                   |                |                   |         | ns          | *               | *            | ns      | ns          | *              |
|           | NE/10 RBD y       |           |               |                   |                |                   |         |             | ns              | *            | ns      | ns          | ns             |
|           | NE/IVT/10 RBD y   |           |               |                   |                |                   |         |             |                 | *            | **      | ns          | ns             |
|           | advx/10RBD y      |           |               |                   |                |                   |         |             |                 |              | **      | **          | *              |
|           | RBD20 y           |           |               |                   |                |                   |         |             |                 |              |         | ns          | *              |
|           | NE/20 RBD y       |           |               |                   |                |                   |         |             |                 |              |         |             | ns             |
|           | NE/IVT/20RBD y    |           |               |                   |                |                   |         |             |                 |              |         |             | ns             |
| <b>G.</b> | IL13              | RBD10 old | NE/10 RBD old | NE/IVT 10 RBD old | advx/10RBD old | NE/IVT 20 RBD old | RBD10 y | NE/10 RBD y | NE/IVT/10 RBD y | advx/10RBD y | RBD20 y | NE/20 RBD y | NE/IVT/20RBD y |
|           | RBD10 old         | ns        | ns            | *                 | *              | *                 | ns      | ns          | *               | *            | ns      | *           | *              |
|           | NE/10 RBD old     |           |               |                   | ns             | **                | ns      | ns          | ns              | **           | ns      | ns          | ns             |
|           | NE/IVT 10 RBD old |           |               |                   | ns             | ns                | ns      | ns          | ns              | ns           | ns      | ns          | ns             |
|           | advx/10RBD old    |           |               |                   | ns             | ns                | ns      | ns          | ns              | *            | ns      | ns          | ns             |
|           | NE/IVT 20 RBD old |           |               |                   |                |                   | *       | *           | ns              | ns           | *       | ns          | ns             |
|           | RBD10 y           |           |               |                   |                |                   |         | ns          | *               | *            | ns      | ns          | ns             |
|           | NE/10 RBD y       |           |               |                   |                |                   |         |             | ns              | *            | ns      | ns          | ns             |
|           | NE/IVT/10 RBD y   |           |               |                   |                |                   |         |             |                 | ns           | ns      | ns          | ns             |
|           | advx/10RBD y      |           |               |                   |                |                   |         |             |                 |              | **      | *           | ns             |
|           | RBD20 y           |           |               |                   |                |                   |         |             |                 |              |         | ns          | ns             |
|           | NE/20 RBD y       |           |               |                   |                |                   |         |             |                 |              |         |             | ns             |
|           | NE/IVT/20RBD y    |           |               |                   |                |                   |         |             |                 |              |         |             | ns             |

| cLN |                   | RBD10 old | NE/10 RBD old | NE/IVT 10 RBD old | advx/10RBD old | NE/IVT 20 RBD old | RBD10 y | NE/10 RBD y | NE/IVT/10 RBD y | advx/10RBD y | RBD20 y | NE/20 RBD y | NE/IVT/20RBD y |
|-----|-------------------|-----------|---------------|-------------------|----------------|-------------------|---------|-------------|-----------------|--------------|---------|-------------|----------------|
| H.  | IL6               |           |               |                   |                |                   |         |             |                 |              |         |             |                |
|     | RBD10 old         | *         | *             | *                 | *              | ns                | ns      | *           | *               | ns           | *       | *           |                |
|     | NE/10 RBD old     |           | *             |                   | ns             | *                 | ns      | ns          | ns              | ns           | *       | *           |                |
|     | NE/IVT 10 RBD old |           |               |                   | ns             | ns                | *       | **          | ns              | ns           | ns      | ns          |                |
|     | advx/10RBD old    |           |               |                   |                | *                 | ns      | ns          | ns              | ns           | ns      | ns          |                |
|     | NE/IVT 20 RBD old |           |               |                   |                |                   | *       | **          | *               | *            | ns      | ns          |                |
|     | RBD10 y           |           |               |                   |                |                   |         | ns          | *               | *            | ns      | *           |                |
|     | NE/10 RBD y       |           |               |                   |                |                   |         |             | ns              | ns           | **      | *           |                |
|     | NE/IVT/10 RBD y   |           |               |                   |                |                   |         |             | ns              | ns           | ns      | ns          |                |
|     | advx/10RBD y      |           |               |                   |                |                   |         |             |                 | ns           | ns      | ns          |                |
|     | RBD20 y           |           |               |                   |                |                   |         |             |                 |              | ns      | ns          |                |
|     | NE/20 RBD y       |           |               |                   |                |                   |         |             |                 |              |         | ns          |                |
|     | NE/IVT/20RBD y    |           |               |                   |                |                   |         |             |                 |              |         |             |                |
| cLN |                   |           |               |                   |                |                   |         |             |                 |              |         |             |                |
| I.  | IL17A             |           |               |                   |                |                   |         |             |                 |              |         |             |                |
|     | RBD10 old         | *         | *             | ns                | *              | ns                | *       | *           | ns              | ns           | ns      | *           | *              |
|     | NE/10 RBD old     |           | **            |                   | *              | **                | *       | ns          | *               | **           | ns      | *           | **             |
|     | NE/IVT 10 RBD old |           |               |                   | *              | ns                | *       | **          | ns              | **           | **      | ns          | ns             |
|     | advx/10RBD old    |           |               |                   |                | *                 | ns      | ns          | *               | ns           | *       | *           |                |
|     | NE/IVT 20 RBD old |           |               |                   |                |                   | *       | **          | ns              | **           | **      | ns          | ns             |
|     | RBD10 y           |           |               |                   |                |                   |         | *           | *               | ns           | ns      | ns          | *              |
|     | NE/10 RBD y       |           |               |                   |                |                   |         |             | *               | *            | ns      | *           | **             |
|     | NE/IVT/10 RBD y   |           |               |                   |                |                   |         |             | **              | *            | *       | ns          | ns             |
|     | advx/10RBD y      |           |               |                   |                |                   |         |             |                 | ns           | **      | **          | **             |
|     | RBD20 y           |           |               |                   |                |                   |         |             |                 |              | **      | **          | **             |
|     | NE/20 RBD y       |           |               |                   |                |                   |         |             |                 |              |         | ns          | ns             |
|     | NE/IVT/20RBD y    |           |               |                   |                |                   |         |             |                 |              |         |             |                |
| cLN |                   |           |               |                   |                |                   |         |             |                 |              |         |             |                |
| J.  | IL10              |           |               |                   |                |                   |         |             |                 |              |         |             |                |
|     | RBD10 old         | ns        | ns            | ns                | ns             | *                 | ns      | ns          | *               | *            | ns      | ns          | *              |
|     | NE/10 RBD old     |           |               | ns                | ns             | **                | ns      | ns          | ns              | ns           | ns      | ns          | ns             |
|     | NE/IVT 10 RBD old |           |               |                   | ns             | ns                | *       | *           | ns              | ns           | *       | ns          | ns             |
|     | advx/10RBD old    |           |               |                   |                | *                 | ns      | *           | ns              | ns           | ns      | ns          | ns             |
|     | NE/IVT 20 RBD old |           |               |                   |                |                   | *       | **          | ns              | ns           | **      | ns          | ns             |
|     | RBD10 y           |           |               |                   |                |                   |         | ns          | *               | ns           | ns      | ns          | ns             |
|     | NE/10 RBD y       |           |               |                   |                |                   |         |             | *               | *            | ns      | ns          | *              |
|     | NE/IVT/10 RBD y   |           |               |                   |                |                   |         |             |                 | ns           | *       | ns          | ns             |
|     | advx/10RBD y      |           |               |                   |                |                   |         |             |                 | ns           | ns      | ns          | ns             |
|     | RBD20 y           |           |               |                   |                |                   |         |             |                 |              | ns      | *           | *              |
|     | NE/20 RBD y       |           |               |                   |                |                   |         |             |                 |              |         | ns          | ns             |
|     | NE/IVT/20RBD y    |           |               |                   |                |                   |         |             |                 |              |         |             |                |
